# Supplementary material for: Expression of a new laccase from Moniliophthora roreri at high levels in Pichia pastoris and its potential application in micropollutant degradation
Source: PubMed Central journal article supplement (PMC5371579; doi:10.1186/s13568-017-0368-3), 2017-03-29
Supplement: 13568_2017_368_MOESM1_ESM.pdf [file 13568_2017_368_MOESM1_ESM.pdf]

## Expression of a new laccase from *Moniliophthora roreri* at high levels in *Pichia pastoris* and its potential application in micropollutant degradation

Agathe Bronikowski<sup>1</sup>, Peter-Leon Hagedoorn<sup>2</sup>, Katja Koschorreck<sup>1</sup>, Vlada B. Urlacher<sup>1,\*</sup>

<sup>1</sup>Institute of Biochemistry and Bioeconomy Science Center (BioSC), Heinrich-Heine University Düsseldorf, Universitätsstraße 1, 40225 Düsseldorf, Germany

<sup>2</sup>Department of Biotechnology, Delft University of Technology, Julianalaan 67, 2628 BC Delft, The Netherlands

\* Corresponding author

Vlada B. Urlacher

Institute of Biochemistry II

Heinrich-Heine University Düsseldorf

Universitätsstraße 1

40225 Düsseldorf, Germany

Tel.: +49-211-8113889

Fax.: +49-211-8113117

e-mail: vlada.urlacher@uni-duesseldorf.de

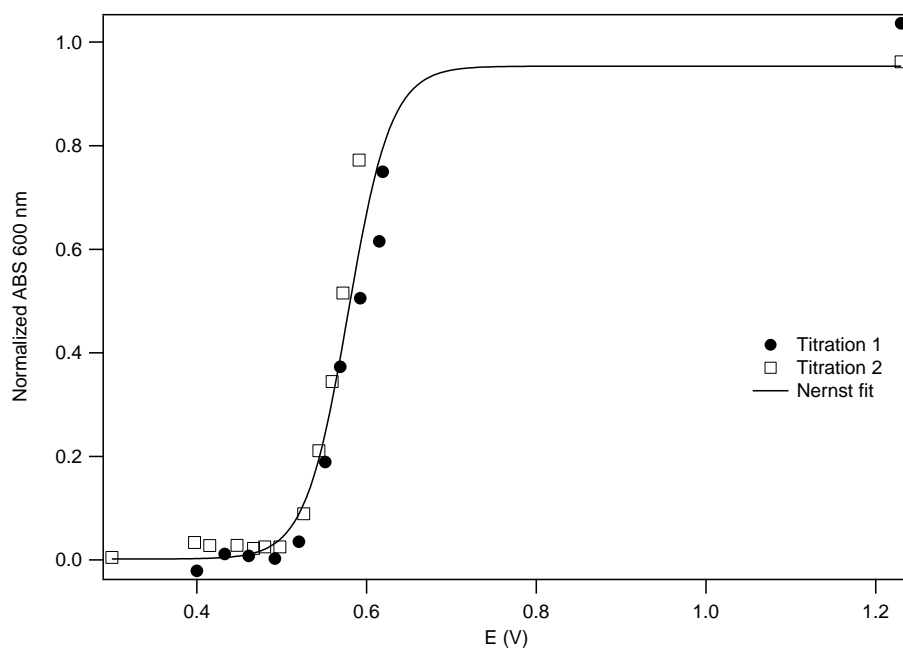

**Figure S1.** Results of two independent redox titrations with Mrl2 (21-26  $\mu\text{M}$ ) and the  $[\text{Fe}(\text{CN})_6]^{3-} / [\text{Fe}(\text{CN})_6]^{4-}$  redox mediator couple. The fully oxidized sample was set to 1.23 V. Fit to Nernst curve:  $Y = \frac{A}{1 + e^{\frac{nF}{RT}(E_m - E)}} + B$ . Fixed parameters:  $n = 1$ ;  $T = 293 \text{ K}$ . Fit parameters:  $A = 0.95 \pm 0.04$ ;  $B = 0.00 \pm 0.02$ ;  $E_m = 0.578 \pm 0.004 \text{ V}$ .
